# Supplementary material for: Kinetic analysis of kraft lignin conversion via the Fenton process: process optimization and stochastic modelling
Source: Royal Society of Chemistry journal article supplement (doi:10.1039/d4re00401a), 2024-10-23
Supplement: d4re00401a1.pdf [file d4re00401a1.pdf]

## Kinetic analysis of kraft lignin conversion via Fenton process: Process optimization and stochastic modelling

Lucas Ramos,<sup>a</sup> Giovani Maltempi Mendes,<sup>a</sup> Adriano Francisco Siqueira,<sup>b</sup> Diovana Aparecida dos Santos Napoleão,<sup>b</sup> Anuj Kumar Chandel<sup>\*a</sup>

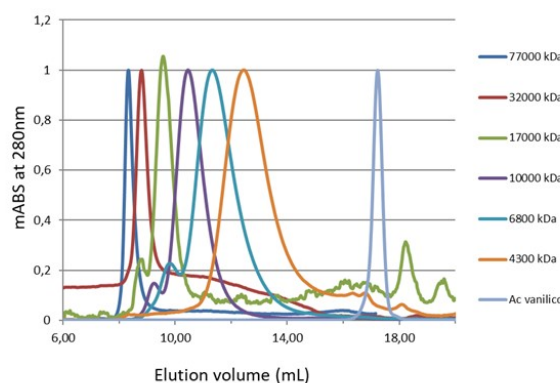

**Figure S 1.** Polystyrene sulfonate standard markers used in the calibration column systems for molecular weight range analysis.

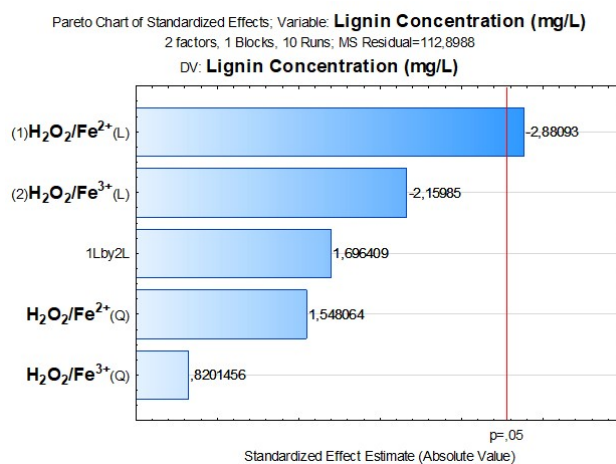

**Figure S 2.** Pareto chart depicting the linear and quadratic effects of the variables  $\text{H}_2\text{O}_2/\text{Fe}^{2+}$  and  $\text{H}_2\text{O}_2/\text{Fe}^{3+}$  molar ratios on final lignin concentration as a response variable.

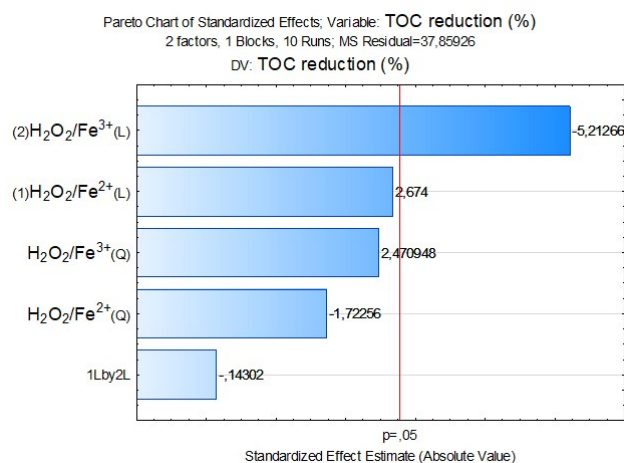

**Figure S 3.** Pareto chart depicting the linear and quadratic effects of the variables H<sub>2</sub>O<sub>2</sub>/Fe<sup>2+</sup> and H<sub>2</sub>O<sub>2</sub>/Fe<sup>3+</sup> molar ratios on the TOC as a response variable.

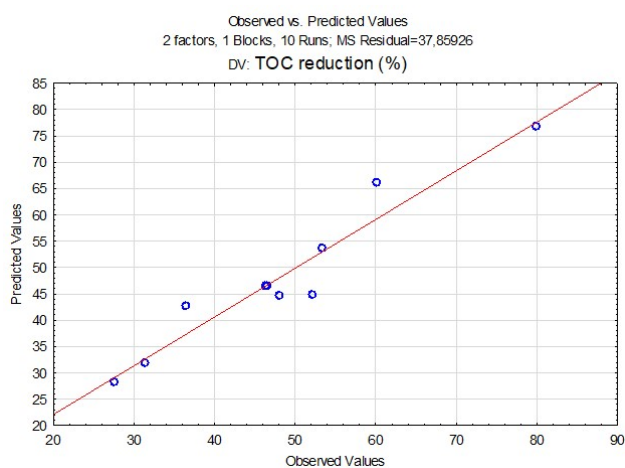

**Figure S 4.** Graph of predicted values versus observed values for the response variable of TOC reduction (%).
